# Supplementary material for: In situ synthesis of ultrathin metal–organic framework nanosheets: a new method for 2D metal-based nanoporous carbon electrocatalysts
Source: Royal Society of Chemistry journal article supplement (doi:10.1039/c7ta05821g), 2017-01-01
Supplement: c7ta05821g1.pdf [file c7ta05821g1.pdf]

*Supporting information for*

*In Situ* Synthesis of Ultrathin Metal-Organic Framework  
Nanosheets: A New Method for 2D Metal-Based  
Nanoporous Carbon Electrocatalysts

Liang Huang,<sup>a,b</sup> Xueping Zhang,<sup>a,c</sup> Yujie Han,<sup>a</sup> Qingqing Wang,<sup>a</sup> Youxing Fang,<sup>a</sup> and  
Shaojun Dong<sup>a,c,\*</sup>

<sup>a</sup>State Key Laboratory of Electroanalytical Chemistry, Changchun Institute of Applied  
Chemistry, Chinese Academy of Science, Changchun, Jilin 130022, PR China

<sup>b</sup>University of Science and Technology of China, Hefei, Anhui 230026 (P. R. China)

<sup>c</sup>University of Chinese Academy of Sciences, Beijing, 100049, PR China

\*Email - [dongsj@ciac.jl.cn](mailto:dongsj@ciac.jl.cn)

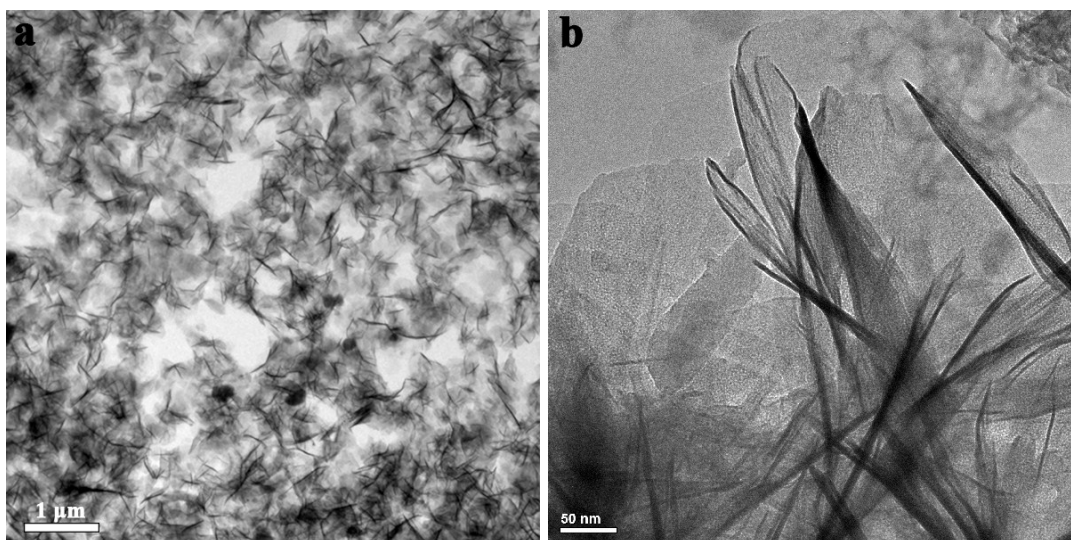

**Fig. S1** Additional (a) large-area and (b) high-magnification TEM images of ZIF-67 nanosheets.

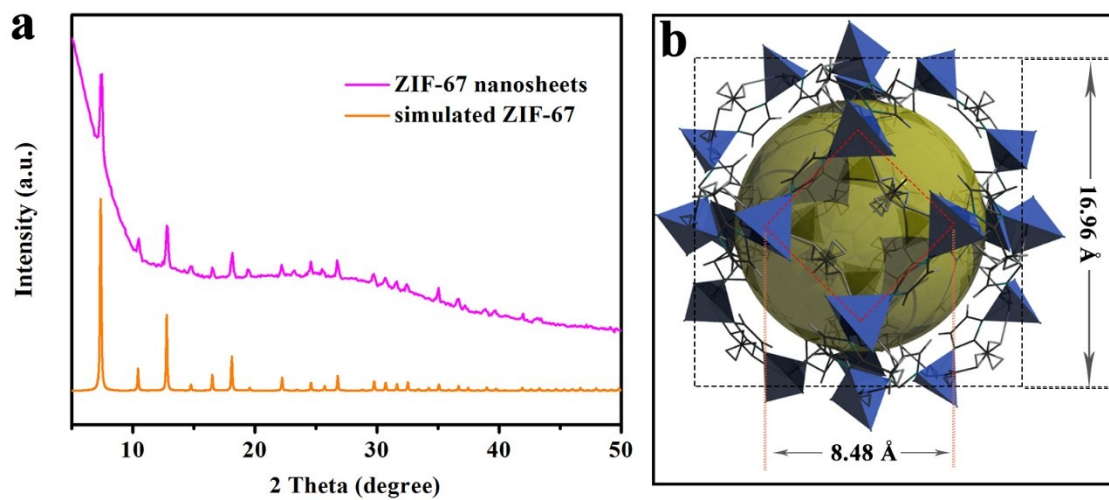

**Fig. S2** (a) XRD patterns of simulated ZIF-67 and as-synthesized ZIF-67 nanosheets. (b) The crystal structure of ZIF-67, yellow represents void space and blue represent  $\text{CoN}_4$  tetrahedra, respectively.

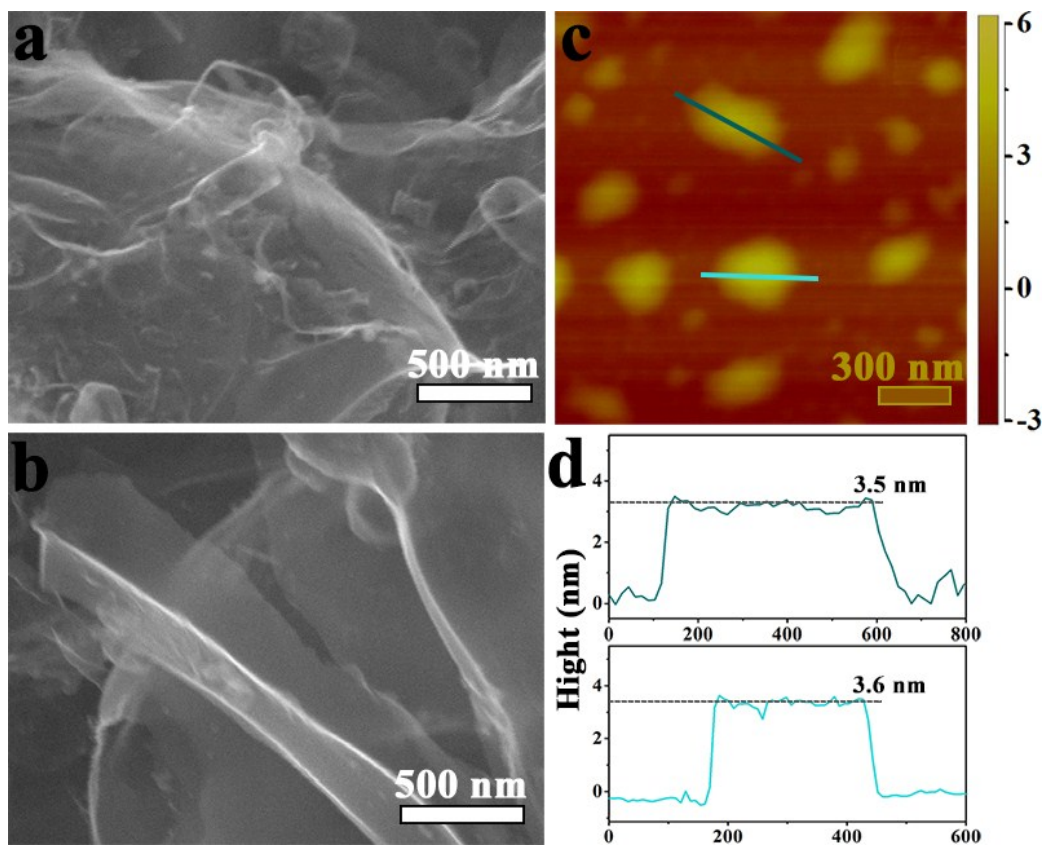

**Fig. S3** SEM images (a-b), AFM image (c) and corresponding height profiles (d) of Co,N-C NS-800°C.

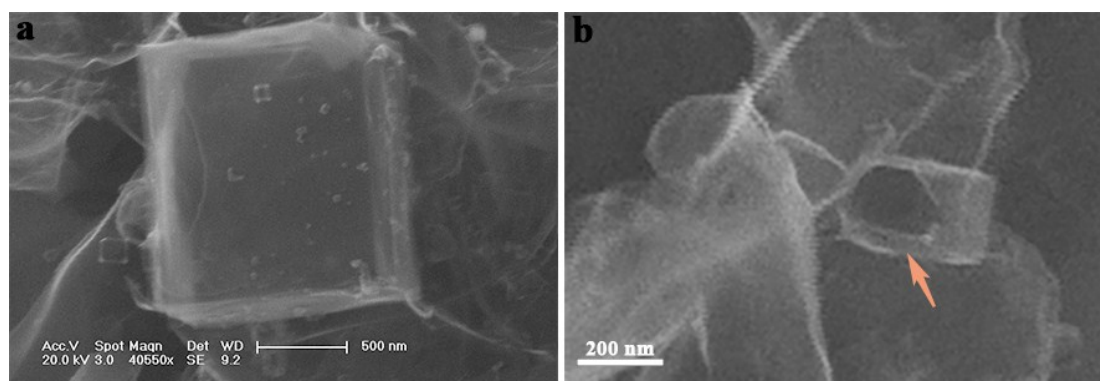

**Fig. S4** SEM images of (a) Co,N-C NS encapsulated NaCl template and (b) Co,N-C NS-800°C with hollow box after NaCl template removal.

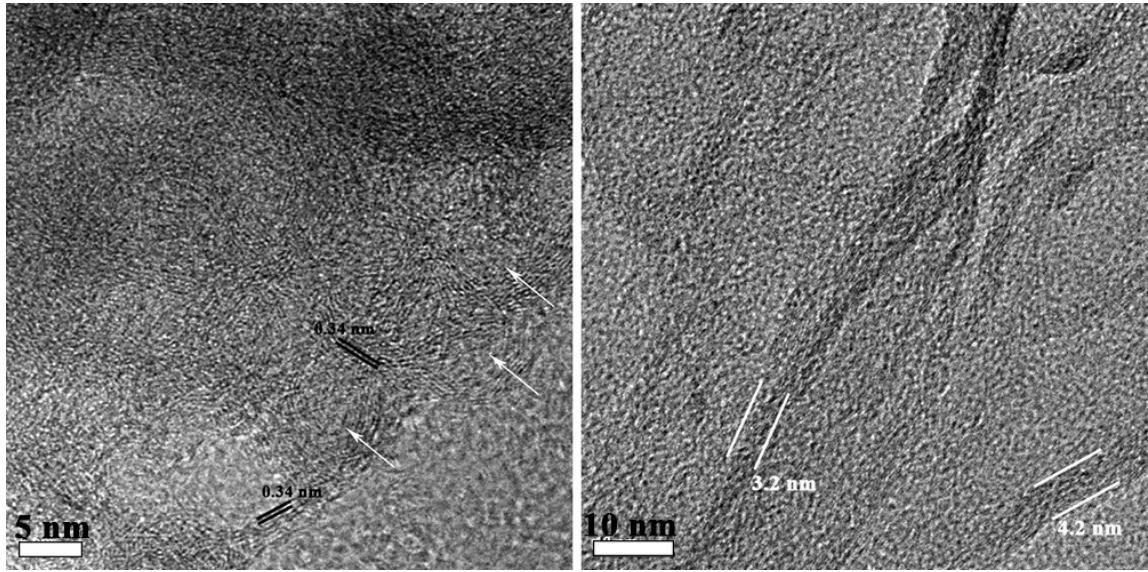

**Fig. S5** TEM images of Co,N-C NS-800°C with (a) graphitic carbon nanopores and (b) ultrathin edge thickness. The interplanar crystalline space is 0.34 nm.

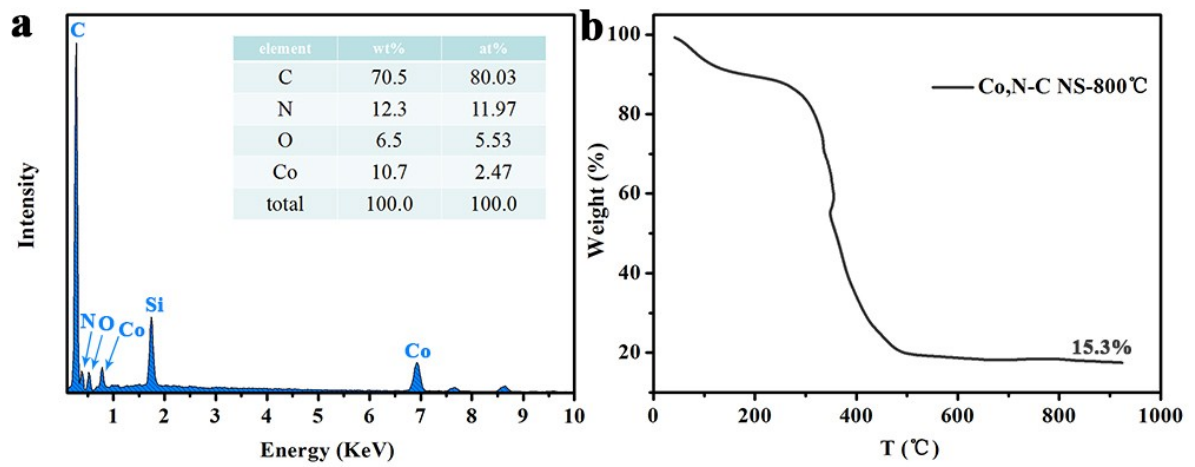

**Fig. S6** (a) EDS spectrum and (b) TGA curve of Co,N-C NS-800°C.

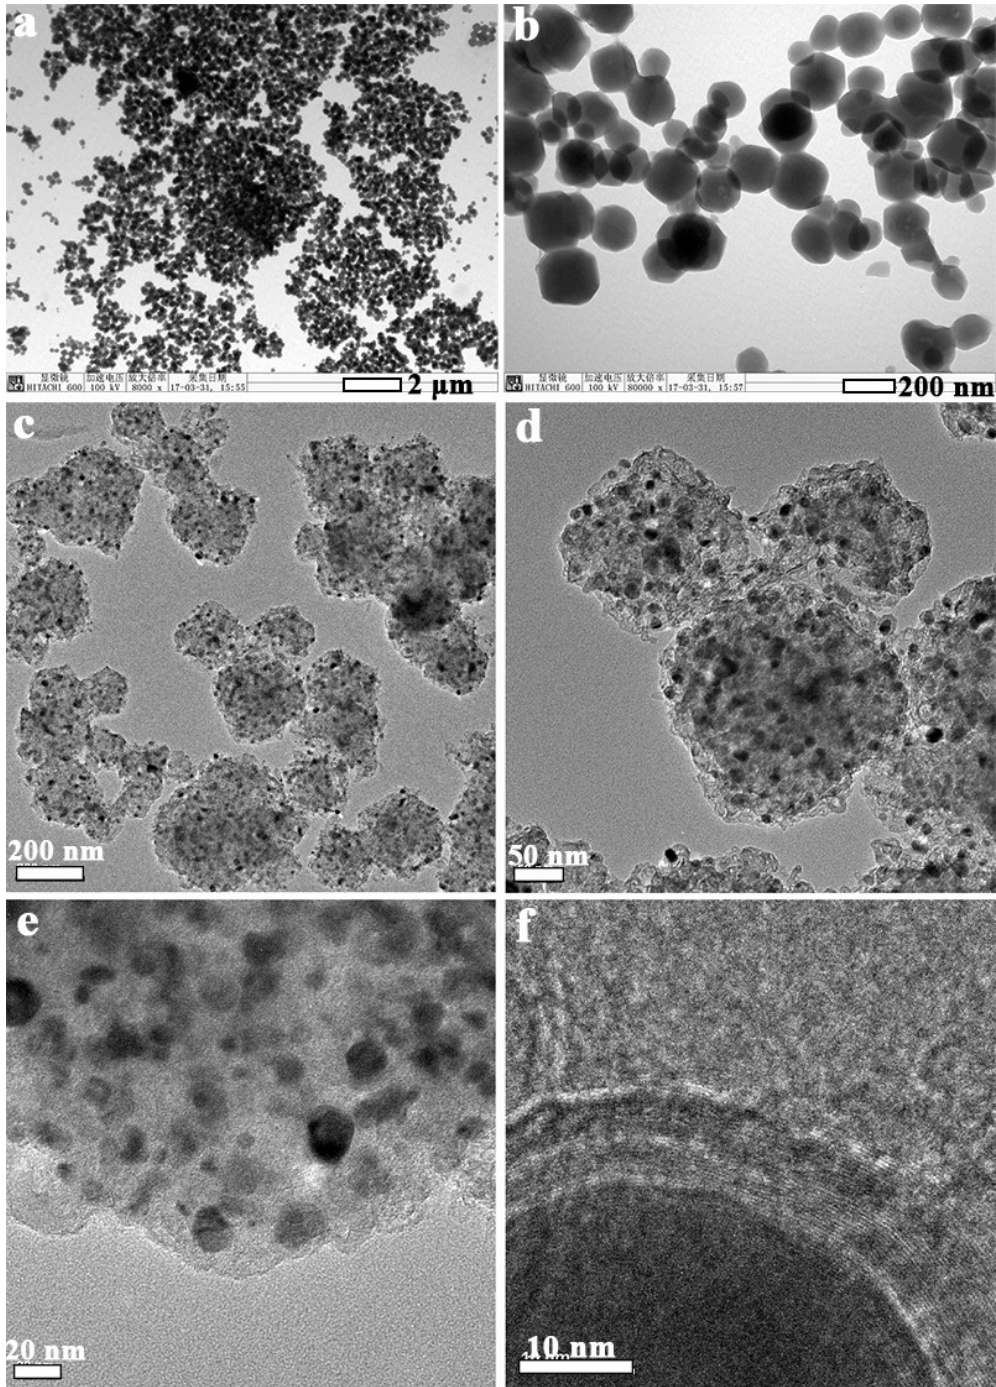

**Fig. S7** (a-b) TEM images of rhombic dodecahedral ZIF-67 nanocrystals. (c-e) TEM images and (f) HRTEM image of Co<sub>3</sub>N-C NP-800°C.

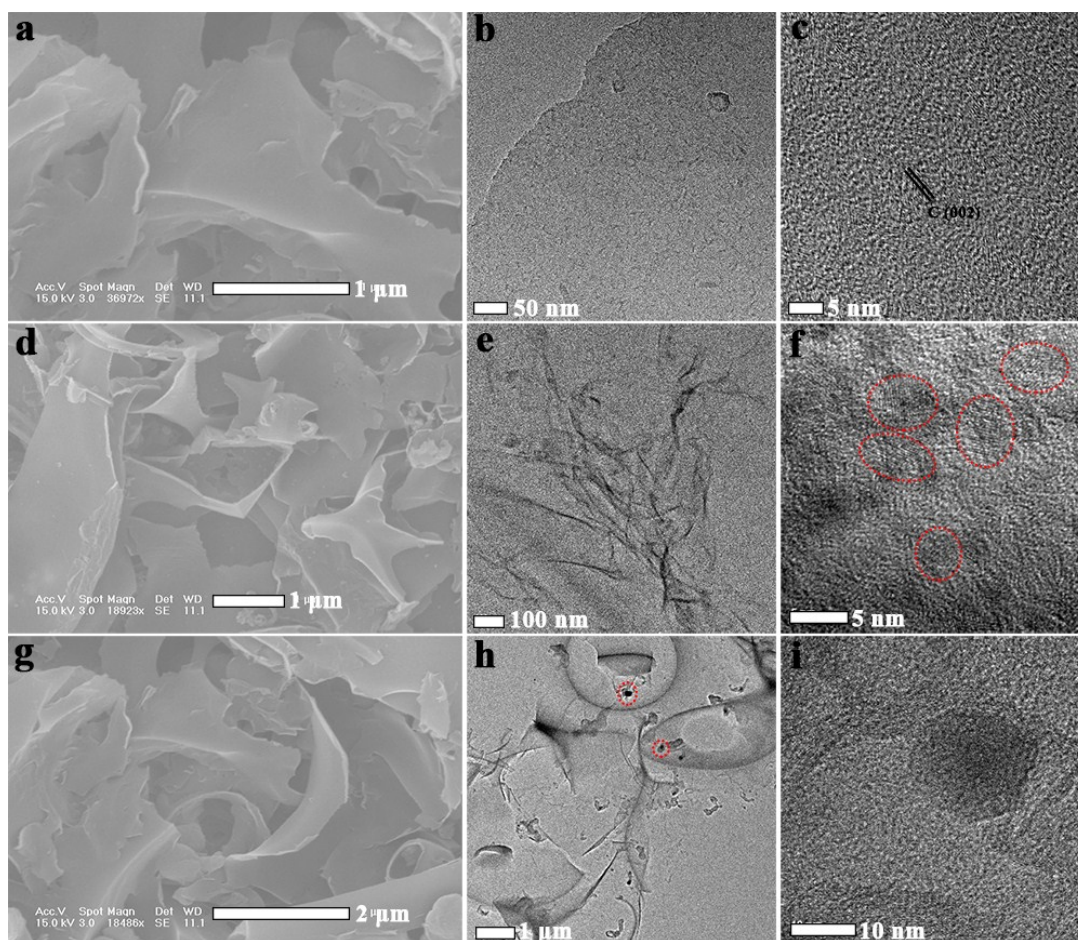

**Fig. S8** SEM images (a), (d) and (g), and TEM images (b-c), (e-f) and (h-i) of Co,N-C NP-600°C, Co,N-C NP-700°C and Co,N-C NP-850°C, respectively.

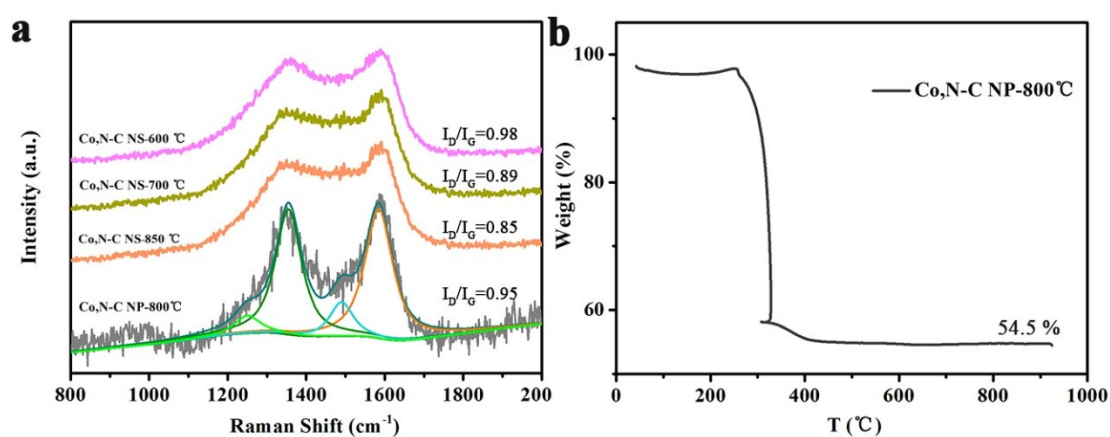

**Fig. S9** (a) Raman spectra of Co,N-C NS-600°C, Co,N-C NS-700°C, Co,N-C NS-850°C and Co,N-C NP-800°C. There are two dominant peaks at 1355 and 1580 cm<sup>-1</sup>, corresponding to D and G bands, respectively. (b) TGA curve of Co,N-C NP-800°C.

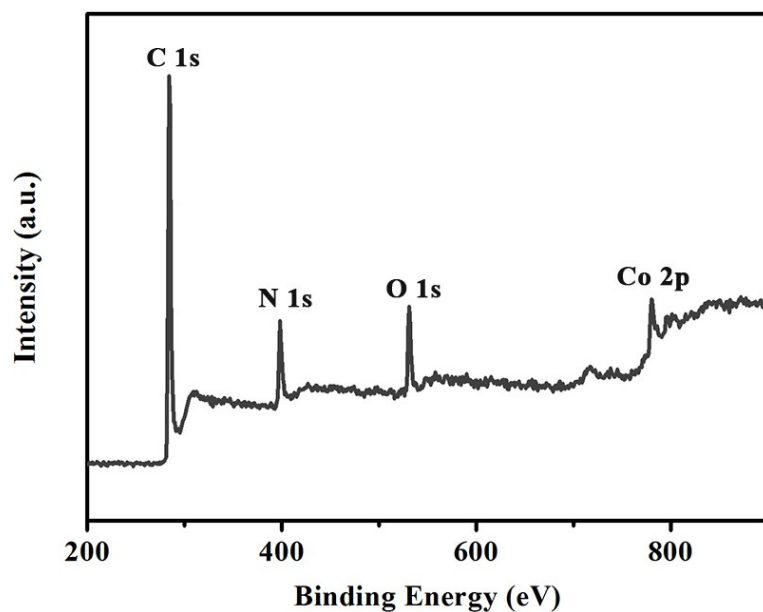

**Fig. S10** XPS spectrum of Co,N-C NS-800°C

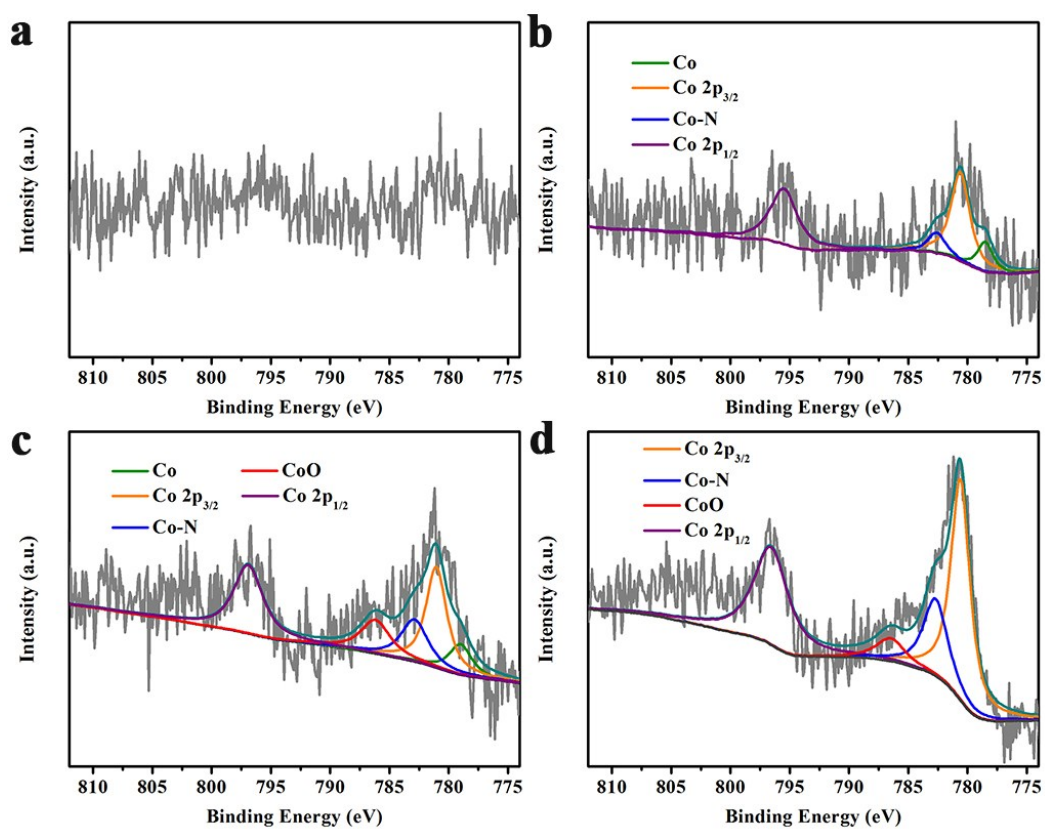

**Fig. S11** High resolution Co 2p XPS spectra of (a) Co,N-C NS-600°C, (b) Co,N-C NS-700°C, (c) Co,N-C NS-850°C and (d) Co,N-C NP-800°C.

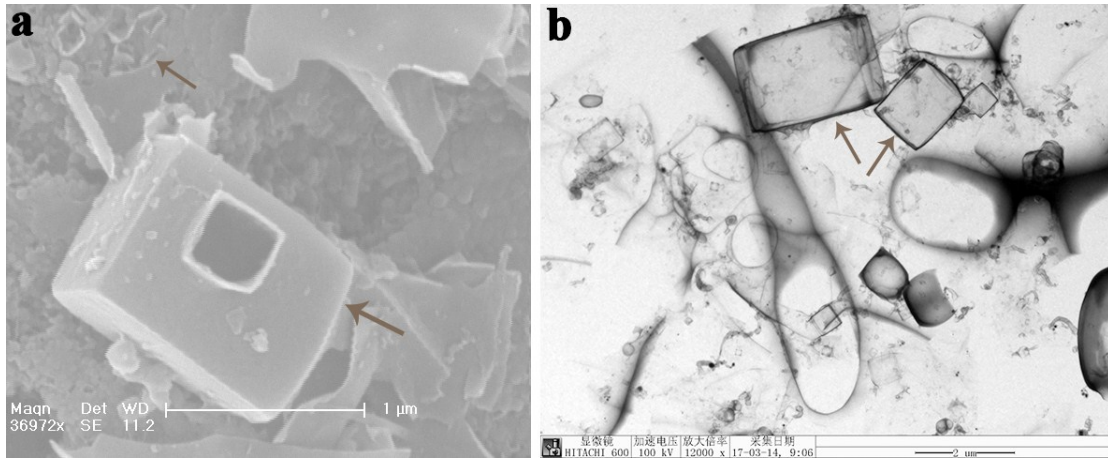

**Fig. S12** (a) SEM image and (b) TEM image of Co,N-C materials with the same reaction conditions as the Co,N-C NS-800°C except the twofold of Co<sup>2+</sup> and MeIm precursors.

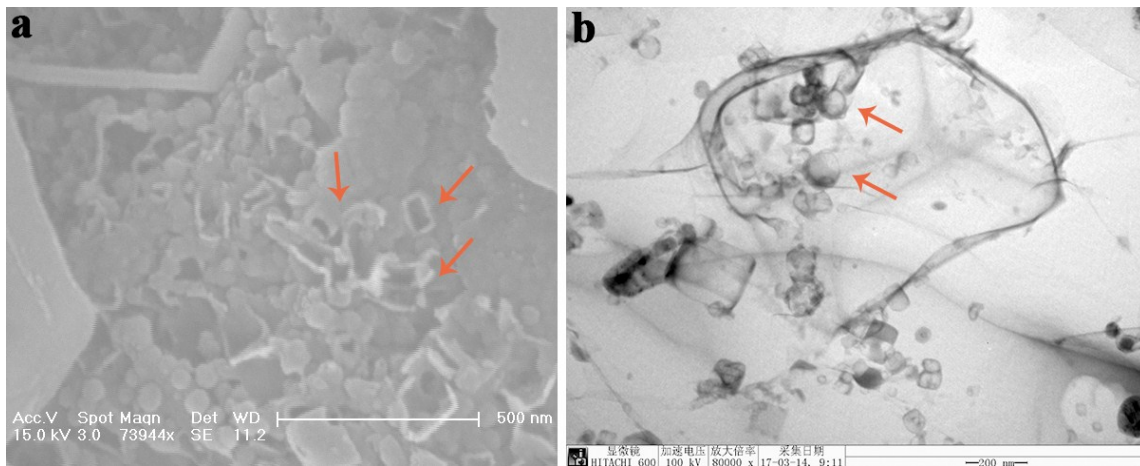

**Fig. S13** (a) SEM image and (b) TEM image of Co,N-C materials with the same reaction conditions as the Co,N-C NS-800°C except the 8 mL of solvent in synthesis of ZIF-67 nanosheets .



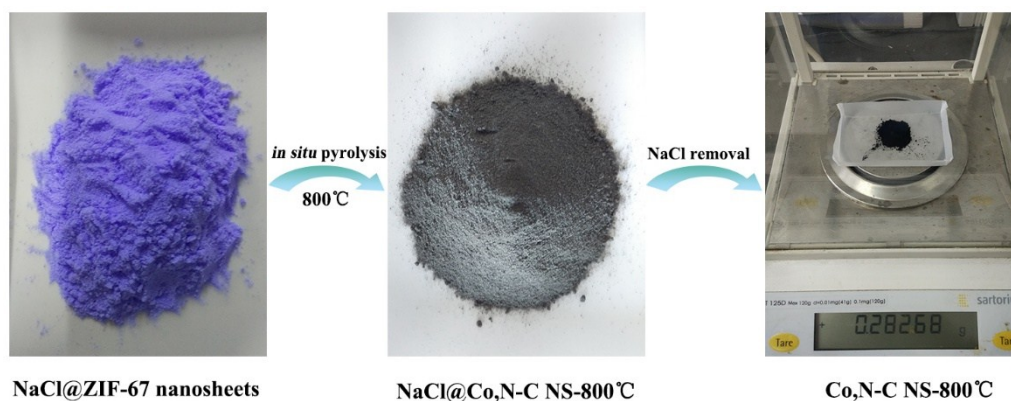

**Fig. S14** Optical images of intermediate products from ZIF-67 nanosheets to Co,N-C NS-800°C. The high-yield synthetic strategy only limited by the volume of reactor and tube furnace.

**Table S1.** Comparisons of ORR performances for Co,N-C NS-800°C with other cobalt-based carbon electrocatalysts in alkaline solution.

| Electrocatalysts                       | $E_{\text{onset}}$ (vs. RHE) | $E_{1/2}$ (vs. RHE) | References       |
|----------------------------------------|------------------------------|---------------------|------------------|
| Co,N-C NS-800°C                        | <b>0.938</b>                 | <b>0.869</b>        | <b>This work</b> |
| Co,N-CNF                               | 0.883                        | 0.81                | [1]              |
| Co-C@NWCs                              | 0.939                        | 0.83                | [2]              |
| Co <sub>3</sub> S <sub>4</sub> -S/G    | 0.920                        | 0.805               | [3]              |
| cal-CoZIF-VXC72                        | -                            | 0.84                | [4]              |
| Z8-Te-1000                             | 0.825                        | 0.74                | [5]              |
| Co/N-CNT                               | 0.940                        | 0.84                | [6]              |
| Co <sub>3</sub> O <sub>4</sub> /N-rmGO | 0.880                        | 0.83                | [7]              |
| Co@N-CNTs                              | 0.929                        | 0.849               | [8]              |
| Co <sub>4</sub> N/CNW/CC               | -                            | 0.80                | [9]              |
| NCNTFs                                 | -                            | 0.87                | [10]             |
| Co/NC                                  | -                            | 0.83                | [11]             |
| CS-FePC_450                            | 0.970                        | 0.87                | [12]             |
| Fe-N-SCCFs                             | -                            | 0.88                | [13]             |
| N-MC/rGO-800                           | 0.960                        | 0.82                | [14]             |
| Co-Mo-C/NRGO                           | 0.869                        | 0.786               | [15]             |

\*NS: nanosheets; NF: nanoframework; WCs: wrinkles carbon nanosheets; CNT: carbon nanotubes; CC: carbon cloth; CNTFs: carbon nanotube frameworks.

## References

- [1] L. Shang, H. Yu, X. Huang, T. Bian, R. Shi, Y. Zhao, G. I. Waterhouse, L. Z. Wu, C. H. Tung, T. Zhang, *Adv. Mater.* **2016**, *28*, 1668.
- [2] Y. Li, F. Cheng, J. Zhang, Z. Chen, Q. Xu, S. Guo, *Small* **2016**, *12*, 2839.
- [3] W. Gu, L. Hu, W. Hong, X. Jia, J. Li, E. Wang, *Chem. Sci.* **2016**, *7*, 4167.
- [4] B. Ni, C. Ouyang, X. Xu, J. Zhuang, X. Wang, *Adv. Mater.* **2017**, DOI 10.1002/adma.201701354.
- [5] W. Zhang, Z. Y. Wu, H. L. Jiang, S. H. Yu, *J. Am. Chem. Soc.* **2014**, *136*, 14385.
- [6] Y. Liu, H. Jiang, Y. Zhu, X. Yang, C. Li, *J. Mater. Chem. A* **2016**, *4*, 1694.
- [7] Y. Liang, Y. Li, H. Wang, J. Zhou, J. Wang, T. Regier, H. Dai, *Nat. Mater.* **2011**, *10*, 780.
- [8] S. Zhang, Y. Zhang, W. Jiang, X. Liu, S. Xu, R. Huo, F. Zhang, J.-S. Hu, *Carbon* **2016**, *107*, 162.
- [9] F. Meng, H. Zhong, D. Bao, J. Yan, X. Zhang, *J. Am. Chem. Soc.* **2016**, *138*, 10226.
- [10] B. Y. Xia, Y. Yan, N. Li, H. B. Wu, X. W. Lou, X. Wang, *Nat. Energy* **2016**, *1*, 15006.
- [11] A. Aijaz, J. Masa, C. Rosler, W. Xia, P. Weide, A. J. Botz, R. A. Fischer, W. Schuhmann, M. Muhler, *Angew. Chem., Int. Ed.* **2016**, *55*, 4087.
- [12] D. Y. Chung, M. J. Kim, N. Kang, J. M. Yoo, H. Shin, O.-H. Kim and Y.-E. Sung, *Chem. Mater.*, 2017, **29**, 2890.
- [13] B. Wang, X. Wang, J. Zou, Y. Yan, S. Xie, G. Hu, Y. Li and A. Dong, *Nano Lett.*, 2017, **17**, 2003.
- [14] W. Niu, L. Li, J. Liu, N. Wang, W. Li, Z. Tang, W. Zhou and S. Chen, *Small*, 2016, **12**, 1900.
- [15] C.-H. Liu, Y.-J. Tang, X.-L. Wang, W. Huang, S.-L. Li, L.-Z. Dong and Y.-Q. Lan, *J. Mater. Chem. A*, 2016, **4**, 18100.
